# Supplementary material
Source: PubMed Central journal article supplement (PMC1989709)
Supplement: biophysj_107.108829_1.pdf [file biophysj_107.108829_1.pdf]

## Supplementary Material

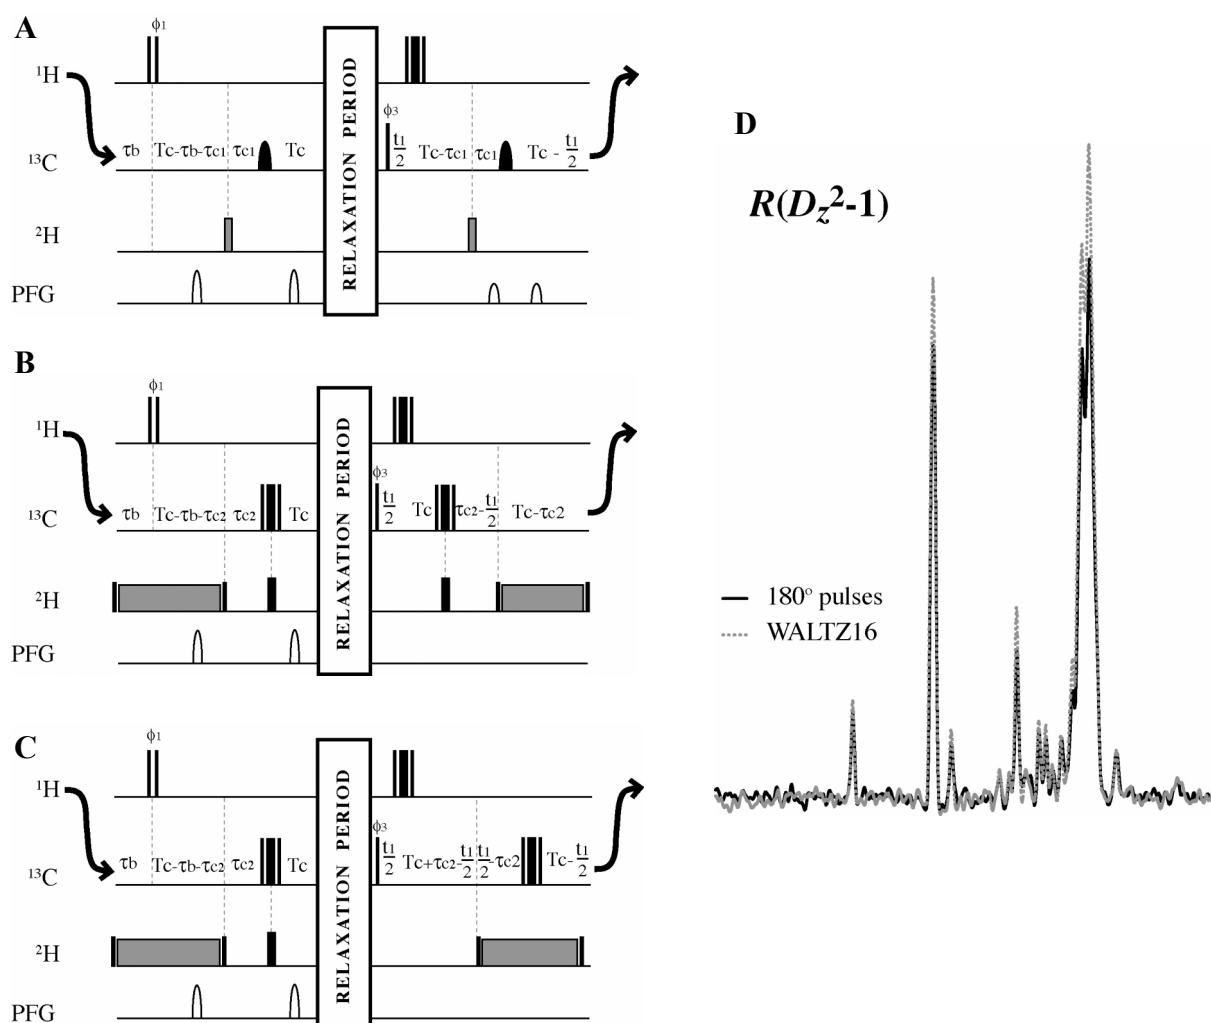

**Figure S1:** Optimization of the pulse sequences to measure the deuterium  $R(D_x D_z)$ ,  $R(D_+^2)$  and  $R(3D_z^2 - I)$  relaxation rates. **A.** Part of the pulse sequence proposed by Millet *et al.* where  $^2\text{H}$  180 pulses are used to refocus the  $^1J_{\text{CD}}$  evolution **B.** Sequence where a WALTZ-16 scheme (grey boxes) is used to decouple the  $^1J_{\text{CD}}$  evolution, for  $\tau_{c2} > t_1/2$  (**B**) and  $\tau_{c2} < t_1/2$  (**C**). **D.** Comparison of a 1D proton spectrum using scheme **A** (solid black line) and scheme **B** (dashed grey line).  $\tau_b = 1/(2^1J_{\text{CH}}) = 3.85$  ms,  $2T_C = 1/(^1J_{\text{CC}}) = 29$  ms,  $\tau_{\text{CD}} = 1/(2^1J_{\text{CD}}) = 24$  ms,  $\tau_{c1} = T_C - \tau_{\text{CD}}/2 = 2.5$  ms,  $\tau_{c2} = \tau_{\text{CD}} - T_C = 9.5$  ms.

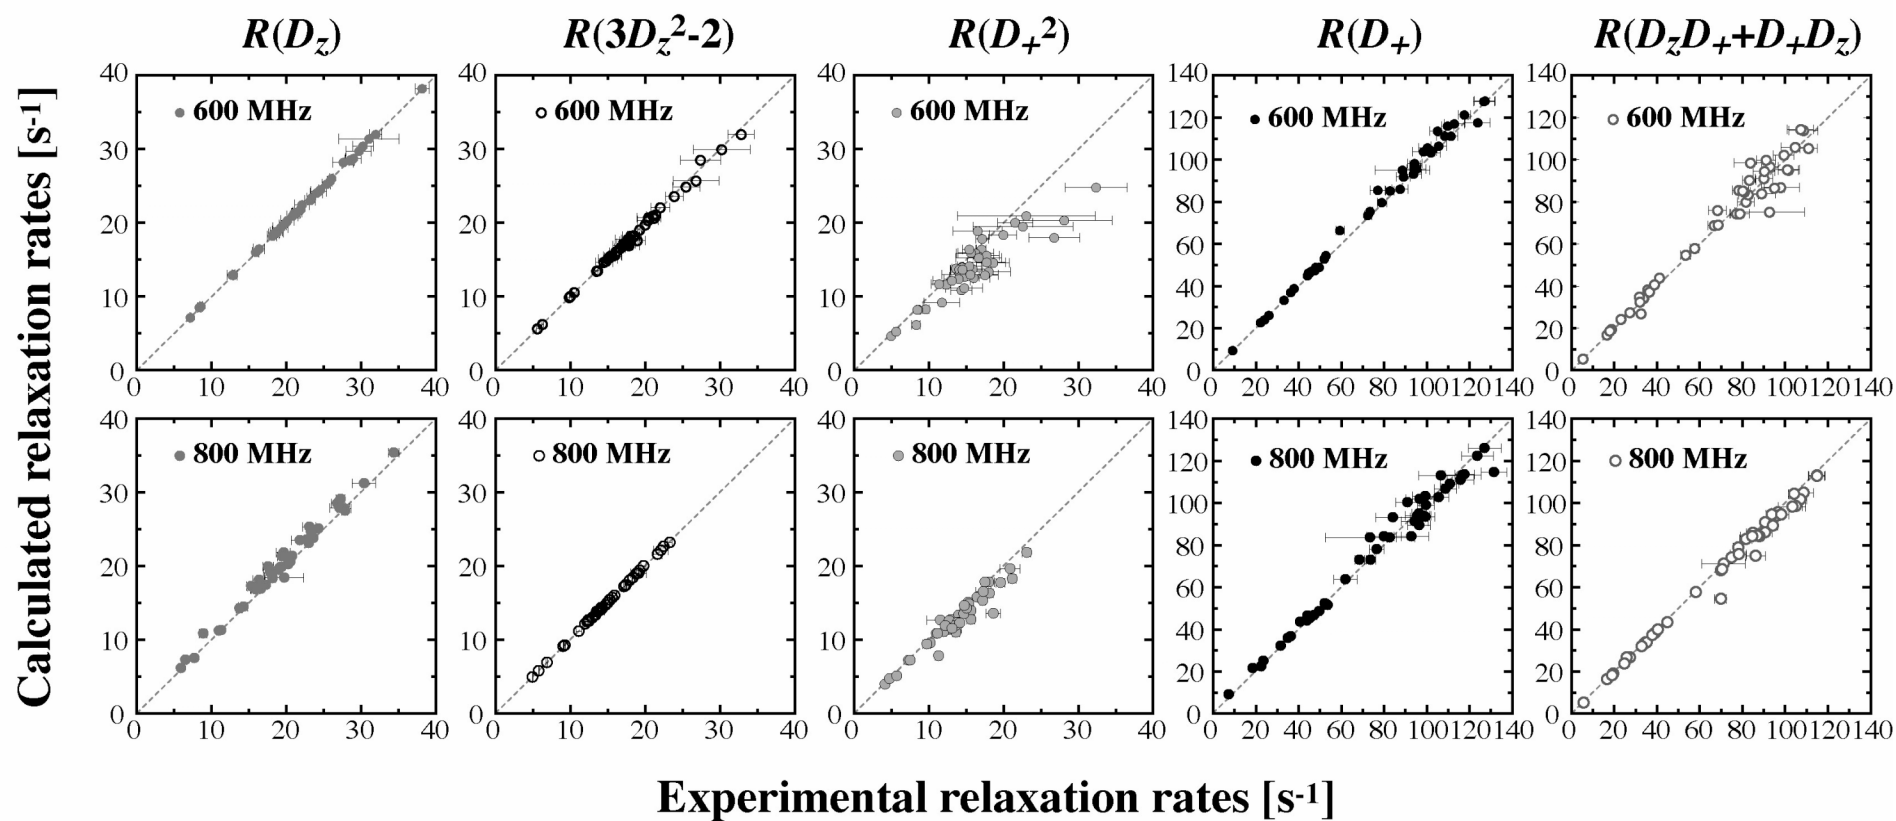

**Figure S2:** Experimental versus back-calculated  $^2\text{H}$  relaxation rates of PX at 600 and 800 MHz. The spectral density values at  $0$ ,  $\omega_D^{600}$ ,  $\omega_D^{800}$ ,  $2\omega_D^{600}$  and  $2\omega_D^{800}$  were extracted from the ten relaxation rates according to eq. 2-6 using a linear least square fit. These values were then used to back-calculate the relaxation rates.

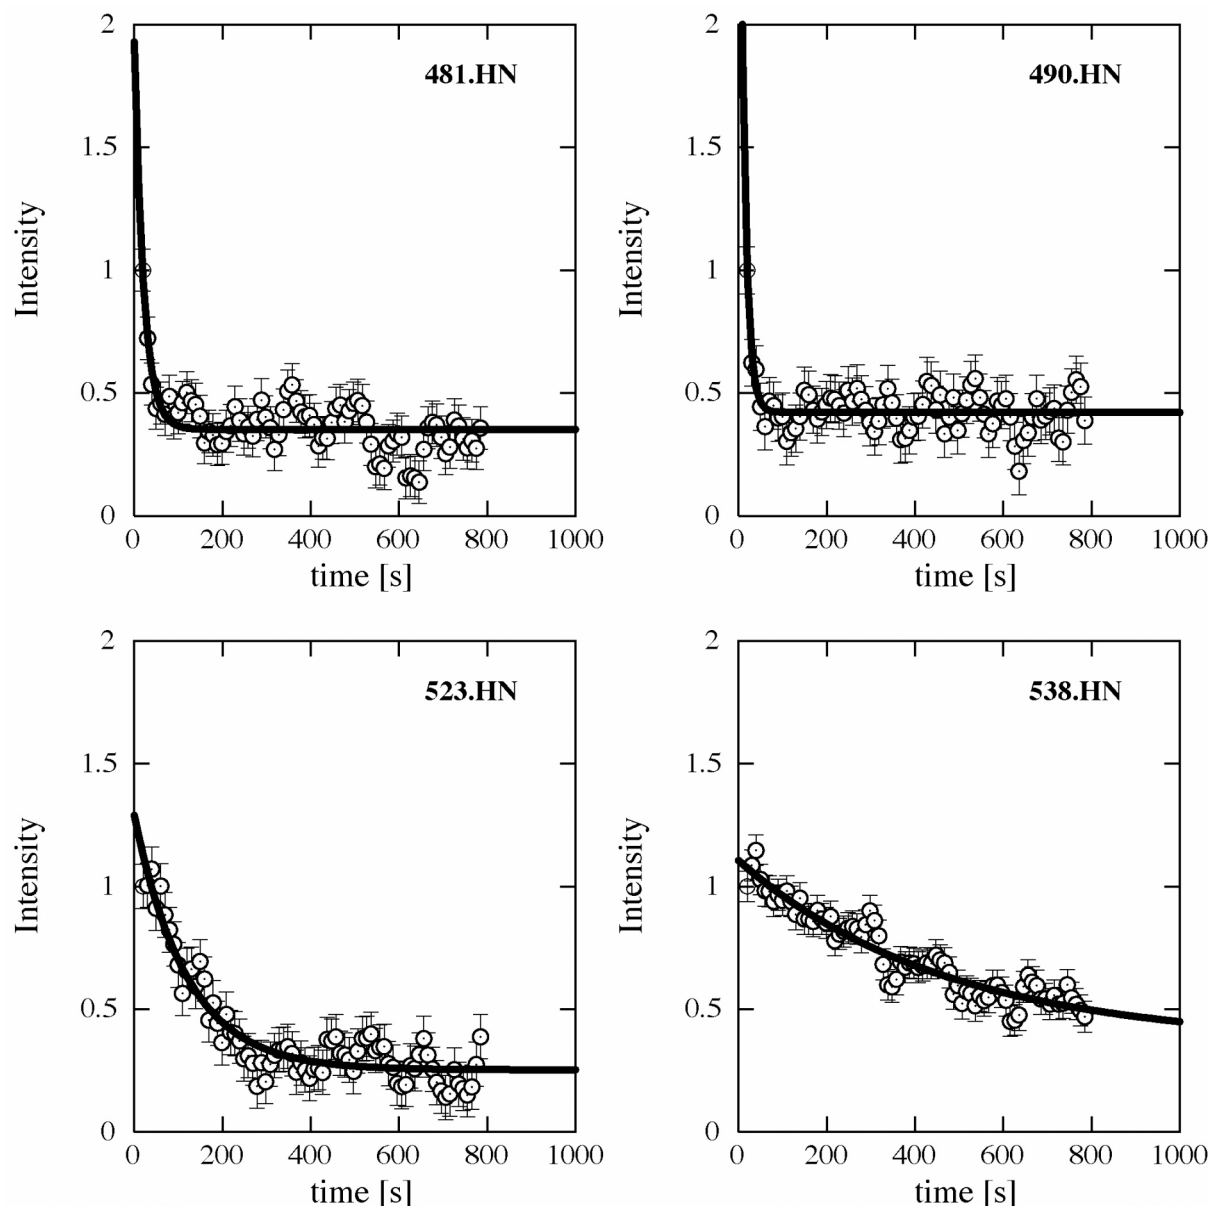

**Figure S3:** Intensity decay curves of PX due to H/D exchange at 25°C. A solution of 100  $\mu\text{l}$  1.3 mM  $^{15}\text{N}$  PX (2.25 M NaCl, 225 mM  $\text{KPO}_4$  pH 6.0) was diluted with 350  $\mu\text{l}$   $\text{D}_2\text{O}$  in the 800 MHz spectrometer by use of a syringe. Decrease of intensity was followed by immediate acquisition of subsequent SOFAST-HMQC spectra (34). Decay curves of four residues are shown. Residues 481 and 490 are located in the unstructured sub-domain of PX and exchange within one minute. Fitted exchange rates for these residues are compatible with intrinsic exchange rates at this temperature. Residues 523 and 538 are located in the structured domain of PX and are hydrogen-bonded to residues 519 and 534, respectively. These results are in agreement with H/D exchange rates measured by dissolving freeze-dried PX in  $\text{D}_2\text{O}$ . The sensitivity of the  $\text{D}_2\text{O}$  dilution experiment is limited by the low solubility of PX, therefore only exchange rates measured using freeze-dried PX are discussed in the main text.

**Table S-I:** Relaxation delays, scans and number of points used to measure the five  $^2\text{H}$  relaxation rates

| Relaxation rate    | Field   | Number of scans | Number of complex data points | Relaxation delays (ms) |          |     |         |          |         |         |           |         |    |    |
|--------------------|---------|-----------------|-------------------------------|------------------------|----------|-----|---------|----------|---------|---------|-----------|---------|----|----|
|                    |         |                 |                               | 0.05 (x2)              | 4.5      | 9.5 | 15      | 21       | 28 (x2) | 36      | 45        | 58      | 71 |    |
| $R(D_z)$           | 600 MHz | 32 scans        | 512 x 83                      | 0.05 (x2)              | 4.5      | 9.5 | 15      | 21       | 28 (x2) | 36      | 45        | 58      | 71 |    |
| $R(D_+)$           | 600 MHz | 32 scans        | 512 x 84                      | 0.2 (x2)               | 1.5      | 3   | 4.7     | 6.6      | 8.7     | 10.9    | 13.5 (x2) | 16.5    | 20 |    |
| $R(3D_z^2-2)$      | 600 MHz | 64 scans        | 512 x 84                      | 0.050                  | 1.5      | 5   | 10      | 20       | 25      | 33      | 44 (x2)   | 54      | 70 |    |
| $R(D_+D_z+D_zD_+)$ | 600 MHz | 64 scans        | 512 x 80                      | 0.550                  | 2 (x2)   | 4   | 8       | 10       | 14 (x2) | 18      | 22        | 28      | 34 |    |
| $R(D_+^2)$         | 600 MHz | 64 scans        | 512 x 80                      | 2.350                  | 6.5 (x2) | 11  | 17      | 24       | 32      | 40      | 50        | 60 (x2) | 70 |    |
| $R(D_z)$           | 800 MHz | 16 scans        | 512 x 84                      | 0.05                   | 4.5      | 10  | 16      | 22       | 29 (x2) | 39      | 52        | 70      |    |    |
| $R(D_+)$           | 800 MHz | 16 scans        | 512 x 84                      | 1.5 (x2)               | 3.0      | 4.7 | 6.6     | 8.7 (x2) | 10.9    | 14.2    | 18.0      |         |    |    |
| $R(3D_z^2-2)$      | 800 MHz | 16 scans        | 512 x 84                      | 2.35                   | 5        | 7.5 | 10 (x2) | 16       | 23      | 31 (x2) | 41        | 54      | 61 |    |
| $R(D_+D_z+D_zD_+)$ | 800 MHz | 48 scans        | 512 x 104                     | 0.7                    | 2        | 4   | 6 (x2)  | 10       | 14      | 18 (x2) | 22        | 28      | 34 |    |
| $R(D_+^2)$         | 800 MHz | 16 scans        | 512 x 84                      | 2.35                   | 5        | 7.5 | 10 (x2) | 16       | 23      | 31 (x2) | 41        | 54      | 61 | 68 |

**Table S-II:** Relaxation delays, scans and number of points used to measure the  $^{15}\text{N}$  relaxation rates

| Relaxation rate    | Field [MHz] | Conc. [mM] | Number of scans | Number of complex data points | Relaxation delays (ms)      |    |     |          |         |          |                                                    |      |          |      |      |     |  |
|--------------------|-------------|------------|-----------------|-------------------------------|-----------------------------|----|-----|----------|---------|----------|----------------------------------------------------|------|----------|------|------|-----|--|
|                    |             |            |                 |                               | reference: recycle-delay 5s |    |     |          |         |          | saturation: recycle-delay 2s + saturation delay 3s |      |          |      |      |     |  |
| hetNOE             | 600         | 0.2        | 104             | 152 x 512                     | reference: recycle-delay 5s |    |     |          |         |          | saturation: recycle-delay 2s + saturation delay 3s |      |          |      |      |     |  |
| hetNOE             | 600         | 1.3        | 32              | 140 x 512                     | reference: recycle-delay 5s |    |     |          |         |          | saturation: recycle-delay 2s + saturation delay 3s |      |          |      |      |     |  |
| $R_1$              | 600         | 0.2        | 16              | 152 x 512                     | 0                           | 56 | 111 | 222      | 333     | 444 (x2) | 666                                                | 888  | 1110     | 1443 | 1776 |     |  |
| $R_2(\text{CPMG})$ | 600         | 0.2        | 24              | 148 x 480                     | 10                          | 30 | 50  | 70       | 90 (x2) | 110      | 130                                                | 150  | 170      | 210  | 230  | 250 |  |
| $R_1$              | 600         | 1.3        | 8               | 152 x 512                     | 0                           | 56 | 111 | 222      | 333     | 444 (x2) | 666                                                | 888  | 1110     | 1443 | 1776 |     |  |
| $R_2(\text{CPMG})$ | 600         | 1.3        | 8               | 140 x 480                     | 10                          | 30 | 50  | 70       | 90 (x2) | 110      | 130                                                | 150  | 170      | 210  | 230  | 250 |  |
| $R_1$              | 800         | 0.2        | 16              | 180 x 512                     | 0                           | 54 | 107 | 214 (x2) | 428     | 642      | 856                                                | 1070 | 1338     | 1605 |      |     |  |
| $R_2(\text{CPMG})$ | 800         | 0.2        | 16              | 200 x 512                     | 10                          | 30 | 50  | 70 (x2)  | 90      | 110      | 130                                                | 150  | 170      | 190  |      |     |  |
| $R_2(R_{1\rho})$   | 800         | 0.2        | 16              | 200 x 512                     | 0                           | 10 | 20  | 30       | 50 (x2) | 70       | 90                                                 | 110  | 130      | 150  | 170  |     |  |
| $R_1$              | 800         | 1.3        | 8               | 180 x 512                     | 0                           | 54 | 107 | 214 (x2) | 428     | 642      | 856                                                | 1070 | 1338     | 1605 |      |     |  |
| $R_2(\text{CPMG})$ | 800         | 1.3        | 8               | 180 x 512                     | 10                          | 30 | 50  | 70 (x2)  | 90      | 110      | 130                                                | 170  | 190      |      |      |     |  |
| $R_2(R_{1\rho})$   | 800         | 1.3        | 8               | 200 x 512                     | 0                           | 10 | 20  | 30       | 50 (x2) | 70       | 90                                                 | 110  | 130 (x2) | 150  | 170  |     |  |

**Table S-III:**  $^{15}\text{N}$  relaxation rates [ $\text{s}^{-1}$ ] of [ $^{15}\text{N}$ ]-PX (600 MHz, 298K,  $\sim 0.2$  mM)

| Res  | hetNOE |       | $R_1$ |       | $R_2$ (CPMG) |       |
|------|--------|-------|-------|-------|--------------|-------|
| G462 | -0.911 | 0.157 | 1.090 | 0.043 | 2.979        | 0.058 |
| S463 | -0.515 | 0.061 | 1.180 | 0.029 | 3.097        | 0.041 |
| H464 | -0.248 | 0.258 | 1.172 | 0.232 | 4.617        | 0.463 |
| I470 | 0.093  | 0.053 | 1.560 | 0.036 | 3.993        | 0.045 |
| E471 | 0.036  | 0.058 | 1.658 | 0.031 | 4.050        | 0.044 |
| G472 | -0.022 | 0.051 | 1.466 | 0.029 | 3.771        | 0.041 |
| M474 | 0.041  | 0.072 | 1.574 | 0.036 | 3.980        | 0.045 |
| K475 | 0.099  | 0.105 | 1.550 | 0.038 | 4.247        | 0.051 |
| Y476 | 0.116  | 0.100 | 1.530 | 0.039 | 4.403        | 0.054 |
| K477 | 0.188  | 0.155 | 1.594 | 0.040 | 4.281        | 0.058 |
| D479 | 0.122  | 0.092 | 1.561 | 0.035 | 4.465        | 0.049 |
| I481 | 0.090  | 0.089 | 1.527 | 0.039 | 4.324        | 0.058 |
| R482 | 0.114  | 0.077 | 1.627 | 0.036 | 4.305        | 0.053 |
| E483 | 0.183  | 0.045 | 1.576 | 0.029 | 4.425        | 0.045 |
| D484 | 0.183  | 0.042 | 1.614 | 0.027 | 4.367        | 0.039 |
| F486 | 0.185  | 0.039 | 1.708 | 0.031 | 4.467        | 0.044 |
| R487 | 0.145  | 0.044 | 1.703 | 0.032 | 4.228        | 0.045 |
| D488 | 0.184  | 0.042 | 1.635 | 0.029 | 4.177        | 0.040 |
| E489 | 0.186  | 0.039 | 1.539 | 0.025 | 4.292        | 0.038 |
| I490 | 0.107  | 0.047 | 1.578 | 0.033 | 4.238        | 0.049 |
| N492 | -      | -     | 1.616 | 0.028 | 4.833        | 0.049 |
| V494 | 0.115  | 0.040 | 1.569 | 0.027 | 4.025        | 0.040 |
| Y495 | 0.178  | 0.049 | 1.646 | 0.034 | 4.311        | 0.049 |
| E497 | 0.076  | 0.039 | 1.634 | 0.025 | 3.810        | 0.037 |
| R498 | 0.050  | 0.037 | 1.510 | 0.023 | 3.783        | 0.034 |
| E501 | -      | -     | 1.582 | 0.016 | 3.656        | 0.024 |
| A504 | -0.037 | 0.035 | 1.504 | 0.022 | 3.305        | 0.033 |
| S505 | -0.114 | 0.040 | 1.302 | 0.025 | 3.579        | 0.035 |
| N506 | -0.068 | 0.051 | 1.408 | 0.038 | 3.749        | 0.051 |
| A507 | -0.030 | 0.035 | 1.445 | 0.023 | 3.577        | 0.031 |
| S508 | -0.021 | 0.034 | 1.445 | 0.023 | 3.657        | 0.031 |
| R509 | 0.023  | 0.041 | 1.467 | 0.027 | 3.913        | 0.037 |
| L511 | 0.055  | 0.047 | 1.540 | 0.029 | 4.114        | 0.048 |
| S513 | 0.107  | 0.057 | 1.442 | 0.032 | 4.421        | 0.052 |
| K514 | 0.153  | 0.068 | 1.462 | 0.037 | 5.895        | 0.070 |
| E515 | 0.164  | 0.052 | 1.498 | 0.032 | 4.987        | 0.054 |
| K516 | 0.349  | 0.078 | 1.485 | 0.036 | 5.941        | 0.077 |
| T518 | 0.498  | 0.108 | 1.509 | 0.072 | 8.266        | 0.175 |
| M519 | 0.635  | 0.122 | 1.482 | 0.105 | 9.330        | 0.294 |
| H520 | 0.674  | 0.132 | 1.540 | 0.085 | 10.614       | 0.247 |
| S521 | 0.641  | 0.098 | 1.636 | 0.072 | 9.973        | 0.185 |
| L522 | 0.792  | 0.155 | 1.491 | 0.083 | 9.778        | 0.244 |
| R523 | 0.661  | 0.106 | 1.687 | 0.062 | 10.034       | 0.166 |
| L524 | 0.791  | 0.129 | 1.718 | 0.077 | 13.082       | 0.308 |

|      |        |       |       |       |        |       |
|------|--------|-------|-------|-------|--------|-------|
| V525 | 0.787  | 0.118 | 1.581 | 0.065 | 9.177  | 0.181 |
| I526 | 0.671  | 0.154 | 1.410 | 0.098 | 16.044 | 0.547 |
| E527 | 0.694  | 0.150 | 1.445 | 0.081 | 14.370 | 0.407 |
| S528 | 0.714  | 0.114 | 1.597 | 0.079 | 11.508 | 0.248 |
| S529 | 0.696  | 0.118 | 1.441 | 0.073 | 9.273  | 0.205 |
| L531 | 0.771  | 0.195 | 1.468 | 0.116 | 11.370 | 0.414 |
| S532 | 0.732  | 0.113 | 1.562 | 0.065 | 8.944  | 0.174 |
| R533 | 0.810  | 0.132 | 1.492 | 0.065 | 9.240  | 0.195 |
| A534 | -      | -     | 1.730 | 0.058 | 10.363 | 0.165 |
| E535 | 0.742  | 0.102 | 1.638 | 0.071 | 9.408  | 0.188 |
| K536 | 0.726  | 0.118 | 1.722 | 0.086 | 10.506 | 0.245 |
| A537 | 0.716  | 0.093 | 1.605 | 0.058 | 11.950 | 0.215 |
| A538 | 0.800  | 0.078 | 1.720 | 0.045 | 9.619  | 0.123 |
| Y539 | 0.733  | 0.092 | 1.634 | 0.059 | 9.798  | 0.168 |
| V540 | 0.750  | 0.146 | 1.738 | 0.084 | 9.664  | 0.242 |
| S542 | 0.828  | 0.099 | 1.615 | 0.048 | 9.298  | 0.131 |
| L543 | 0.651  | 0.129 | 1.701 | 0.084 | 9.127  | 0.219 |
| S544 | 0.804  | 0.118 | 1.597 | 0.061 | 11.233 | 0.191 |
| K545 | 0.669  | 0.142 | 1.642 | 0.086 | 11.507 | 0.296 |
| C546 | 0.689  | 0.102 | 1.653 | 0.068 | 9.003  | 0.162 |
| K547 | 0.601  | 0.176 | 1.469 | 0.128 | 8.667  | 0.379 |
| T548 | 0.672  | 0.173 | 1.342 | 0.088 | 14.114 | 0.463 |
| D549 | 0.598  | 0.097 | 1.630 | 0.091 | 9.766  | 0.256 |
| Q550 | 0.659  | 0.103 | 1.592 | 0.055 | 8.597  | 0.138 |
| E551 | 0.694  | 0.107 | 1.619 | 0.074 | 9.841  | 0.220 |
| V552 | 0.794  | 0.112 | 1.518 | 0.062 | 9.222  | 0.177 |
| K553 | 0.638  | 0.109 | 1.696 | 0.072 | 13.757 | 0.307 |
| A554 | 0.799  | 0.106 | 1.727 | 0.060 | 12.343 | 0.212 |
| V555 | 0.828  | 0.102 | 1.565 | 0.052 | 9.717  | 0.158 |
| M556 | 0.730  | 0.171 | 1.362 | 0.080 | 16.039 | 0.486 |
| E557 | 0.712  | 0.108 | 1.648 | 0.057 | 9.967  | 0.169 |
| L558 | 0.682  | 0.136 | 1.540 | 0.080 | 9.874  | 0.255 |
| V559 | 0.775  | 0.105 | 1.567 | 0.065 | 9.928  | 0.197 |
| E560 | 0.638  | 0.128 | 1.595 | 0.085 | 17.891 | 0.501 |
| E561 | 0.846  | 0.115 | 1.717 | 0.064 | 9.653  | 0.172 |
| D562 | 0.798  | 0.102 | 1.713 | 0.058 | 9.387  | 0.152 |
| I563 | -      | -     | 1.558 | 0.073 | 9.361  | 0.212 |
| S565 | 0.700  | 0.081 | 1.516 | 0.045 | 9.713  | 0.129 |
| L566 | 0.688  | 0.097 | 1.604 | 0.056 | 10.283 | 0.169 |
| T567 | 0.383  | 0.055 | 1.531 | 0.035 | 6.043  | 0.065 |
| N568 | -0.037 | 0.031 | 1.335 | 0.018 | 3.349  | 0.028 |

**Table S-IV:**  $^{15}\text{N}$  relaxation rates [ $\text{s}^{-1}$ ] of [ $^{15}\text{N}$ ]-PX (600 MHz, 298K,  $\sim 1.3$  mM)

| Res  | hetNOE       | $R_1$       | $R_2$ (CPMG) |
|------|--------------|-------------|--------------|
| G462 | -0.657 0.018 | - -         | 3.470 0.025  |
| S463 | -0.382 0.009 | - -         | 3.350 0.020  |
| H464 | -0.177 0.051 | 1.277 0.177 | 4.198 0.218  |
| I470 | 0.129 0.010  | 1.552 0.028 | 5.209 0.029  |
| E471 | 0.106 0.010  | 1.672 0.026 | 4.914 0.025  |
| G472 | 0.070 0.009  | 1.487 0.024 | 4.379 0.024  |
| M474 | 0.096 0.011  | 1.587 0.026 | 5.294 0.028  |
| K475 | 0.129 0.012  | 1.592 0.029 | - -          |
| Y476 | 0.196 0.011  | 1.542 0.031 | 5.433 0.029  |
| K477 | 0.187 0.012  | 1.570 0.031 | 5.899 0.035  |
| D479 | 0.202 0.011  | 1.538 0.028 | 5.523 0.028  |
| I481 | 0.177 0.012  | 1.576 0.030 | 5.819 0.034  |
| R482 | 0.188 0.012  | 1.638 0.029 | 5.676 0.032  |
| E483 | 0.204 0.010  | 1.630 0.024 | 5.828 0.030  |
| D484 | 0.220 0.008  | 1.634 0.022 | 5.816 0.027  |
| F486 | 0.245 0.009  | 1.669 0.025 | 5.428 0.027  |
| R487 | 0.217 0.009  | 1.663 0.026 | 5.734 0.028  |
| D488 | 0.229 0.009  | - -         | - -          |
| E489 | 0.194 0.008  | 1.559 0.020 | 5.605 0.026  |
| I490 | 0.179 0.010  | 1.577 0.026 | 5.284 0.030  |
| N492 | 0.165 0.010  | - -         | - -          |
| V494 | 0.149 0.009  | 1.544 0.021 | 5.511 0.028  |
| Y495 | 0.172 0.010  | 1.610 0.026 | 5.106 0.031  |
| E497 | 0.109 0.008  | 1.577 0.020 | 4.866 0.022  |
| R498 | 0.093 0.008  | 1.594 0.019 | 4.771 0.021  |
| A504 | -0.002 0.007 | 1.565 0.018 | 4.006 0.019  |
| S505 | -0.046 0.007 | 1.361 0.248 | 3.795 0.018  |
| N506 | -0.047 0.010 | 1.445 0.135 | 4.538 0.028  |
| A507 | -0.010 0.007 | 1.523 0.142 | 3.987 0.017  |
| S508 | 0.003 0.007  | 1.465 0.260 | 4.526 0.018  |
| R509 | 0.041 0.008  | 1.571 0.021 | 4.365 0.022  |
| L511 | 0.050 0.010  | 1.490 0.023 | 4.986 0.030  |
| S513 | 0.103 0.010  | 1.468 0.026 | 5.336 0.030  |
| K514 | 0.140 0.011  | 1.474 0.028 | 7.112 0.044  |
| E515 | 0.177 0.010  | 1.459 0.024 | 6.572 0.037  |
| K516 | 0.292 0.013  | 1.414 0.029 | 7.030 0.048  |
| T518 | 0.519 0.022  | 1.537 0.064 | 10.110 0.128 |
| M519 | 0.638 0.033  | 1.559 0.100 | 12.057 0.255 |
| H520 | 0.705 0.027  | 1.457 0.075 | 13.207 0.212 |
| S521 | 0.699 0.022  | 1.519 0.062 | 13.194 0.168 |
| L522 | 0.737 0.032  | 1.533 0.087 | 12.564 0.226 |
| R523 | 0.709 0.021  | 1.538 0.056 | 13.248 0.338 |
| L524 | 0.747 0.027  | 1.531 0.069 | 15.849 0.261 |
| V525 | 0.702 0.021  | 1.528 0.062 | 12.288 0.161 |



|      |        |       |       |       |        |       |
|------|--------|-------|-------|-------|--------|-------|
| I526 | 0.785  | 0.038 | 1.480 | 0.102 | 18.145 | 0.493 |
| E527 | 0.756  | 0.034 | 1.511 | 0.086 | 17.178 | 0.379 |
| S528 | 0.756  | 0.025 | 1.474 | 0.069 | 14.531 | 0.215 |
| S529 | 0.677  | 0.025 | 1.428 | 0.071 | 11.961 | 0.190 |
| L531 | 0.737  | 0.037 | 1.425 | 0.101 | 14.853 | 0.384 |
| S532 | 0.702  | 0.025 | 1.509 | 0.066 | 11.754 | 0.175 |
| R533 | 0.722  | 0.025 | 1.456 | 0.060 | 11.834 | 0.175 |
| A534 | 0.755  | 0.020 | 1.571 | 0.051 | 12.863 | 0.145 |
| E535 | 0.762  | 0.024 | 1.542 | 0.067 | 12.119 | 0.172 |
| K536 | 0.749  | 0.031 | 1.509 | 0.078 | 13.444 | 0.239 |
| A537 | 0.784  | 0.022 | 1.477 | 0.053 | 15.147 | 0.189 |
| A538 | 0.760  | 0.016 | 1.519 | 0.039 | 12.864 | 0.118 |
| Y539 | 0.794  | 0.023 | 1.591 | 0.056 | 12.443 | 0.148 |
| V540 | 0.754  | 0.030 | 1.539 | 0.074 | 12.916 | 0.224 |
| K541 | -      | -     | -     | -     | -      | -     |
| S542 | 0.719  | 0.019 | 1.478 | 0.043 | 11.843 | 0.118 |
| L543 | 0.735  | 0.029 | 1.571 | 0.075 | 12.019 | 0.212 |
| S544 | 0.806  | 0.022 | 1.546 | 0.060 | 13.734 | 0.159 |
| K545 | 0.712  | 0.029 | 1.486 | 0.075 | 14.322 | 0.252 |
| C546 | 0.674  | 0.020 | 1.528 | 0.059 | 11.036 | 0.135 |
| K547 | 0.687  | 0.045 | 1.392 | 0.121 | 11.747 | 0.357 |
| T548 | 0.657  | 0.034 | 1.269 | 0.077 | 16.679 | 0.376 |
| D549 | 0.710  | 0.031 | 1.530 | 0.083 | 12.617 | 0.227 |
| Q550 | 0.622  | 0.019 | 1.494 | 0.047 | 11.056 | 0.116 |
| E551 | 0.753  | 0.028 | 1.460 | 0.071 | 13.101 | 0.211 |
| V552 | 0.709  | 0.024 | 1.536 | 0.065 | 12.464 | 0.173 |
| K553 | 0.740  | 0.025 | 1.513 | 0.062 | 16.157 | 0.247 |
| A554 | 0.716  | 0.020 | 1.571 | 0.052 | 14.791 | 0.182 |
| V555 | 0.709  | 0.021 | 1.502 | 0.051 | 12.723 | 0.159 |
| M556 | 0.681  | 0.030 | 1.505 | 0.084 | 18.432 | 0.387 |
| E557 | 0.781  | 0.023 | 1.637 | 0.058 | 13.170 | 0.157 |
| L558 | 0.733  | 0.029 | 1.499 | 0.073 | 12.856 | 0.228 |
| V559 | 0.758  | 0.024 | 1.501 | 0.061 | 13.075 | 0.187 |
| E560 | 0.711  | 0.029 | 1.586 | 0.082 | 19.689 | 0.400 |
| E561 | 0.729  | 0.022 | 1.563 | 0.056 | 13.053 | 0.160 |
| D562 | 0.735  | 0.020 | 1.539 | 0.053 | 12.269 | 0.139 |
| I563 | 0.754  | 0.027 | 1.502 | 0.076 | 12.454 | 0.208 |
| E564 | 0.732  | 0.022 | -     | -     | -      | -     |
| S565 | 0.634  | 0.016 | 1.522 | 0.043 | 11.758 | 0.112 |
| L566 | 0.598  | 0.018 | 1.494 | 0.049 | 12.251 | 0.130 |
| T567 | 0.372  | 0.010 | 1.497 | 0.027 | 7.662  | 0.044 |
| N568 | -0.002 | 0.006 | 1.363 | 0.014 | 4.112  | 0.017 |

**Table S-V:**  $^{15}\text{N}$  relaxation rates [ $\text{s}^{-1}$ ] of [ $^{15}\text{N}$ ]-PX (800 MHz, 298K,  $\sim 0.2$  mM)

| Res  | $R_1$ |       | $R_2$ (CPMG) |       | $R_2$ ( $R_{1\rho}$ ) |       |
|------|-------|-------|--------------|-------|-----------------------|-------|
| G462 | -     | -     | 3.253        | 0.044 | -                     | -     |
| H464 | 1.095 | 0.167 | 4.378        | 0.357 | 4.734                 | 0.355 |
| I470 | 1.362 | 0.035 | 5.459        | 0.065 | 5.551                 | 0.066 |
| E471 | 1.335 | 0.053 | 4.988        | 0.048 | 4.999                 | 0.069 |
| G472 | 1.308 | 0.030 | 4.416        | 0.045 | 4.780                 | 0.061 |
| R473 | 1.321 | 0.035 | 4.954        | 0.048 | 4.946                 | 0.049 |
| M474 | 1.328 | 0.057 | 4.749        | 0.046 | 4.976                 | 0.064 |
| K475 | 1.316 | 0.078 | 5.014        | 0.054 | 5.158                 | 0.076 |
| Y476 | 1.335 | 0.092 | 5.114        | 0.053 | 5.708                 | 0.086 |
| K477 | 1.345 | 0.094 | 5.647        | 0.075 | 5.423                 | 0.100 |
| D479 | 1.324 | 0.079 | 5.753        | 0.059 | 5.603                 | 0.071 |
| L480 | -     | -     | 5.381        | 0.051 | 5.650                 | 0.092 |
| I481 | 1.328 | 0.092 | 5.377        | 0.059 | 5.667                 | 0.084 |
| R482 | 1.414 | 0.058 | 5.672        | 0.074 | 5.683                 | 0.061 |
| E483 | 1.363 | 0.035 | 5.148        | 0.051 | 5.425                 | 0.049 |
| D484 | 1.376 | 0.027 | 5.781        | 0.054 | 5.251                 | 0.048 |
| E485 | 1.387 | 0.026 | -            | -     | -                     | -     |
| F486 | 1.401 | 0.030 | 5.470        | 0.056 | 5.575                 | 0.055 |
| R487 | 1.383 | 0.031 | 5.638        | 0.064 | 5.477                 | 0.063 |
| D488 | 1.410 | 0.026 | 5.176        | 0.052 | 5.506                 | 0.053 |
| E489 | 1.310 | 0.024 | 5.182        | 0.058 | 5.431                 | 0.045 |
| I490 | 1.351 | 0.031 | 5.330        | 0.051 | 5.700                 | 0.065 |
| R491 | 1.360 | 0.015 | -            | -     | -                     | -     |
| N492 | -     | -     | 5.564        | 0.058 | -                     | -     |
| V494 | 1.303 | 0.022 | 5.257        | 0.051 | 5.231                 | 0.049 |
| Y495 | 1.346 | 0.033 | 5.523        | 0.073 | 5.749                 | 0.068 |
| E497 | 1.356 | 0.022 | 4.326        | 0.048 | 5.066                 | 0.042 |
| R498 | 1.354 | 0.021 | 4.410        | 0.042 | 4.771                 | 0.041 |
| T500 | -     | -     | 4.119        | 0.041 | 4.200                 | 0.041 |
| E501 | 1.348 | 0.013 | -            | -     | -                     | -     |
| A504 | 1.328 | 0.018 | 4.131        | 0.044 | 4.603                 | 0.043 |
| S505 | 1.201 | 0.019 | 4.182        | 0.039 | 4.440                 | 0.037 |
| N506 | 1.216 | 0.028 | 4.689        | 0.053 | 5.080                 | 0.053 |
| A507 | 1.261 | 0.018 | 4.420        | 0.041 | 4.742                 | 0.038 |
| S508 | 1.241 | 0.017 | 4.581        | 0.038 | 4.619                 | 0.037 |
| R509 | 1.283 | 0.023 | 4.691        | 0.047 | 4.996                 | 0.047 |
| L511 | 1.237 | 0.026 | 5.603        | 0.063 | 5.678                 | 0.061 |
| S513 | 1.196 | 0.030 | 5.718        | 0.069 | 5.670                 | 0.062 |
| K514 | 1.264 | 0.037 | 7.633        | 0.105 | 7.927                 | 0.091 |
| E515 | 1.229 | 0.029 | 5.998        | 0.064 | 6.374                 | 0.072 |
| K516 | 1.144 | 0.038 | 6.931        | 0.094 | 7.740                 | 0.100 |
| T518 | 1.155 | 0.065 | 10.353       | 0.241 | 10.583                | 0.246 |
| M519 | 1.129 | 0.119 | 11.583       | 0.376 | 11.373                | 0.401 |
| H520 | 1.134 | 0.074 | 12.864       | 0.269 | 12.994                | 0.296 |

|      |       |       |        |       |        |       |
|------|-------|-------|--------|-------|--------|-------|
| S521 | 1.162 | 0.058 | 12.651 | 0.248 | 12.195 | 0.241 |
| L522 | 1.189 | 0.083 | 13.580 | 0.384 | 12.311 | 0.328 |
| R523 | 1.209 | 0.057 | 12.986 | 0.254 | 12.455 | 0.218 |
| L524 | 1.109 | 0.087 | 16.430 | 0.469 | 15.097 | 0.385 |
| V525 | 1.076 | 0.062 | 11.180 | 0.237 | 11.693 | 0.234 |
| I526 | 1.117 | 0.112 | 20.716 | 0.857 | 16.674 | 0.607 |
| E527 | 1.069 | 0.117 | 18.216 | 0.642 | 16.155 | 0.528 |
| S528 | 1.099 | 0.064 | 14.804 | 0.313 | 13.841 | 0.330 |
| S529 | 1.199 | 0.088 | 10.997 | 0.266 | 11.181 | 0.253 |
| L531 | 1.059 | 0.126 | 15.096 | 0.700 | 14.860 | 0.596 |
| S532 | 1.112 | 0.064 | 11.013 | 0.201 | 10.665 | 0.222 |
| R533 | 1.083 | 0.069 | 11.163 | 0.233 | 11.895 | 0.255 |
| A534 | -     | -     | 12.816 | 0.195 | 12.624 | 0.227 |
| E535 | 1.065 | 0.052 | 11.404 | 0.244 | 11.495 | 0.204 |
| K536 | 1.093 | 0.082 | 13.230 | 0.304 | 12.207 | 0.284 |
| A537 | 1.125 | 0.051 | 15.462 | 0.276 | 13.761 | 0.239 |
| A538 | 1.190 | 0.037 | 11.716 | 0.160 | 12.060 | 0.150 |
| Y539 | 1.146 | 0.051 | 11.832 | 0.231 | 11.348 | 0.191 |
| V540 | 1.156 | 0.093 | 12.117 | 0.319 | 12.454 | 0.319 |
| K541 | -     | -     | 12.216 | 0.174 | -      | -     |
| S542 | 1.147 | 0.042 | 11.305 | 0.170 | 11.345 | 0.166 |
| L543 | 1.189 | 0.102 | 11.550 | 0.310 | 12.064 | 0.327 |
| S544 | -     | -     | 12.347 | 0.200 | 12.316 | 0.209 |
| K545 | 1.085 | 0.092 | 14.874 | 0.383 | 13.909 | 0.354 |
| C546 | 1.121 | 0.068 | 11.399 | 0.219 | 10.664 | 0.205 |
| K547 | 0.965 | 0.133 | 9.942  | 0.438 | 11.074 | 0.592 |
| T548 | 0.995 | 0.111 | 18.762 | 0.813 | 14.494 | 0.627 |
| D549 | 1.035 | 0.086 | 11.356 | 0.310 | 12.490 | 0.349 |
| Q550 | 1.167 | 0.051 | 10.789 | 0.158 | 11.047 | 0.173 |
| E551 | 1.087 | 0.061 | 12.108 | 0.289 | 12.312 | 0.286 |
| V552 | 1.121 | 0.060 | 12.272 | 0.249 | 12.099 | 0.235 |
| K553 | 1.190 | 0.071 | 18.381 | 0.473 | 15.348 | 0.381 |
| A554 | 1.141 | 0.063 | 15.575 | 0.345 | 14.219 | 0.299 |
| V555 | 1.091 | 0.046 | 12.066 | 0.209 | 11.863 | 0.180 |
| M556 | 1.220 | 0.103 | 21.775 | 0.866 | 16.826 | 0.574 |
| E557 | 1.252 | 0.055 | 12.101 | 0.236 | 12.252 | 0.211 |
| L558 | 1.051 | 0.083 | 12.331 | 0.303 | 12.346 | 0.321 |
| V559 | 1.147 | 0.056 | 12.450 | 0.239 | 12.590 | 0.228 |
| E560 | 1.139 | 0.094 | 21.887 | 0.842 | 17.857 | 0.615 |
| E561 | 1.215 | 0.057 | 12.388 | 0.235 | 12.297 | 0.213 |
| D562 | 1.114 | 0.046 | 11.371 | 0.204 | 11.973 | 0.192 |
| I563 | -     | -     | 11.098 | 0.271 | 11.370 | 0.268 |
| E564 | 1.276 | 0.044 | -      | -     | -      | -     |
| S565 | 1.131 | 0.039 | 11.907 | 0.172 | 11.407 | 0.154 |
| L566 | 1.144 | 0.063 | 12.960 | 0.243 | 12.247 | 0.230 |
| T567 | 1.211 | 0.029 | 7.421  | 0.070 | 7.273  | 0.077 |

N568 1.130 0.014 4.205 0.040 4.220 0.036

**Table S-VI:**  $^{15}\text{N}$  relaxation rates [ $\text{s}^{-1}$ ] of [ $^{15}\text{N}$ ]-PX (800 MHz, 298K,  $\sim 1.3$  mM)

| Res  | $R_1$ |       | $R_2$ (CPMG) |       | $R_2$ ( $R_{1\rho}$ ) |       |
|------|-------|-------|--------------|-------|-----------------------|-------|
| G462 | -     | -     | 3.973        | 0.038 | -                     | -     |
| S463 | -     | -     | 4.060        | 0.030 | -                     | -     |
| H464 | 1.132 | 0.106 | 5.578        | 0.223 | 4.831                 | 0.091 |
| I470 | 1.357 | 0.028 | 6.107        | 0.044 | 6.191                 | 0.021 |
| E471 | -     | -     | 6.158        | 0.043 | 6.193                 | 0.022 |
| G472 | 1.294 | 0.023 | 5.634        | 0.039 | 5.552                 | 0.020 |
| R473 | 1.329 | 0.021 | 6.039        | 0.036 | 5.818                 | 0.015 |
| M474 | 1.345 | 0.033 | 6.448        | 0.044 | 6.225                 | 0.019 |
| K475 | -     | -     | 6.626        | 0.051 | 6.422                 | 0.022 |
| Y476 | 1.295 | 0.042 | 7.028        | 0.055 | 6.752                 | 0.024 |
| K477 | 1.325 | 0.042 | 6.759        | 0.060 | 6.895                 | 0.030 |
| D479 | -     | -     | 7.301        | 0.048 | 7.071                 | 0.021 |
| L480 | -     | -     | 6.805        | 0.049 | 6.667                 | 0.022 |
| I481 | -     | -     | 7.127        | 0.060 | 6.891                 | 0.026 |
| R482 | 1.361 | 0.039 | 6.898        | 0.059 | 7.057                 | 0.029 |
| E483 | 1.349 | 0.027 | 6.767        | 0.049 | 6.728                 | 0.021 |
| D484 | 1.353 | 0.021 | 7.164        | 0.043 | 6.872                 | 0.018 |
| E485 | 1.337 | 0.022 | -            | -     | -                     | -     |
| F486 | 1.363 | 0.022 | 6.903        | 0.043 | 6.571                 | 0.017 |
| R487 | 1.343 | 0.025 | 7.016        | 0.049 | 6.893                 | 0.020 |
| D488 | 1.352 | 0.022 | 6.805        | 0.056 | 6.768                 | 0.023 |
| E489 | 1.292 | 0.019 | 6.647        | 0.041 | 6.408                 | 0.017 |
| I490 | 1.335 | 0.025 | 7.080        | 0.059 | 6.811                 | 0.024 |
| R491 | 1.316 | 0.053 | -            | -     | -                     | -     |
| N492 | -     | -     | 6.395        | 0.042 | -                     | -     |
| V494 | 1.290 | 0.018 | 6.291        | 0.042 | 6.135                 | 0.017 |
| Y495 | -     | -     | 6.419        | 0.051 | 6.749                 | 0.023 |
| Q496 | 1.311 | 0.011 | -            | -     | -                     | -     |
| E497 | 1.307 | 0.016 | 5.600        | 0.034 | 5.558                 | 0.015 |
| R498 | 1.333 | 0.016 | 5.393        | 0.032 | 5.426                 | 0.013 |
| D499 | -     | -     | -            | -     | -                     | -     |
| T500 | -     | -     | 4.780        | 0.030 | 4.725                 | 0.013 |
| E501 | 1.332 | 0.011 | 4.828        | 0.024 | -                     | -     |
| A504 | 1.296 | 0.014 | 4.522        | 0.026 | 4.609                 | 0.013 |
| S505 | 1.196 | 0.013 | 4.386        | 0.027 | 4.640                 | 0.011 |
| N506 | 1.227 | 0.021 | 5.332        | 0.038 | 5.031                 | 0.016 |
| A507 | 1.266 | 0.013 | 4.615        | 0.027 | 5.095                 | 0.013 |
| S508 | 1.233 | 0.013 | 4.986        | 0.026 | 5.111                 | 0.012 |
| R509 | 1.318 | 0.016 | 5.700        | 0.036 | -                     | -     |
| L511 | 1.224 | 0.018 | 5.968        | 0.046 | 6.491                 | 0.021 |
| S513 | 1.185 | 0.021 | 6.312        | 0.048 | 6.253                 | 0.020 |

|      |       |       |        |       |        |       |
|------|-------|-------|--------|-------|--------|-------|
| K514 | 1.229 | 0.025 | 8.731  | 0.067 | 8.742  | 0.029 |
| E515 | 1.200 | 0.021 | 7.565  | 0.059 | 7.549  | 0.025 |
| K516 | 1.141 | 0.029 | 8.605  | 0.078 | 9.152  | 0.036 |
| T518 | 1.149 | 0.055 | 13.191 | 0.255 | 12.832 | 0.110 |
| M519 | 1.069 | 0.108 | 15.175 | 0.526 | 14.509 | 0.208 |
| H520 | 1.063 | 0.062 | 16.318 | 0.353 | 15.501 | 0.144 |
| S521 | 1.054 | 0.048 | 14.964 | 0.294 | 15.059 | 0.118 |
| L522 | 1.075 | 0.071 | 14.867 | 0.441 | 16.336 | 0.200 |
| R523 | 1.004 | 0.045 | 16.578 | 0.306 | 15.089 | 0.114 |
| L524 | 0.988 | 0.066 | 20.474 | 0.519 | 17.879 | 0.193 |
| V525 | 1.038 | 0.055 | 15.182 | 0.304 | 15.325 | 0.128 |
| I526 | 1.031 | 0.099 | 22.368 | 0.949 | 19.358 | 0.324 |
| E527 | 1.072 | 0.099 | 21.513 | 0.737 | 18.706 | 0.261 |
| S528 | 1.051 | 0.052 | 17.505 | 0.383 | 16.310 | 0.147 |
| S529 | 1.010 | 0.065 | 14.789 | 0.332 | 14.093 | 0.135 |
| L531 | 1.054 | 0.105 | 18.267 | 0.716 | 17.097 | 0.274 |
| S532 | 1.078 | 0.062 | 13.848 | 0.302 | 14.129 | 0.121 |
| R533 | 1.042 | 0.064 | 14.816 | 0.331 | 15.094 | 0.139 |
| A534 | -     | -     | 16.447 | 0.276 | 15.676 | 0.111 |
| E535 | 1.037 | 0.049 | 14.692 | 0.280 | 14.375 | 0.113 |
| K536 | 1.019 | 0.072 | 16.883 | 0.432 | 15.571 | 0.165 |
| A537 | 1.055 | 0.042 | 18.695 | 0.341 | 16.746 | 0.125 |
| A538 | 1.060 | 0.031 | 15.403 | 0.194 | 15.270 | 0.083 |
| Y539 | 1.081 | 0.044 | 15.299 | 0.260 | 14.972 | 0.103 |
| V540 | 1.052 | 0.078 | 15.700 | 0.429 | 15.141 | 0.172 |
| K541 | 1.093 | 0.037 | -      | -     | -      | -     |
| S542 | 1.035 | 0.034 | 14.104 | 0.193 | 14.255 | 0.084 |
| L543 | 1.047 | 0.085 | 14.526 | 0.383 | 15.352 | 0.170 |
| S544 | -     | -     | 14.941 | 0.248 | 15.480 | 0.109 |
| K545 | 0.989 | 0.070 | 17.213 | 0.414 | 16.318 | 0.166 |
| C546 | 1.013 | 0.054 | 13.798 | 0.244 | 13.480 | 0.101 |
| K547 | 0.986 | 0.116 | 14.016 | 0.702 | 13.288 | 0.281 |
| T548 | 0.893 | 0.085 | 21.463 | 0.949 | 15.946 | 0.254 |
| D549 | 1.043 | 0.078 | 15.051 | 0.429 | 15.028 | 0.178 |
| Q550 | 1.080 | 0.040 | 12.581 | 0.163 | 12.618 | 0.071 |
| E551 | 1.023 | 0.055 | 16.091 | 0.370 | 15.558 | 0.149 |
| V552 | 0.988 | 0.051 | 15.524 | 0.322 | 15.354 | 0.134 |
| K553 | 1.078 | 0.058 | 21.953 | 0.566 | 18.345 | 0.192 |
| A554 | 1.076 | 0.049 | 19.047 | 0.378 | 17.314 | 0.143 |
| V555 | 0.991 | 0.041 | 15.616 | 0.245 | 15.175 | 0.102 |
| M556 | 1.070 | 0.078 | 22.689 | 0.841 | 19.898 | 0.287 |
| E557 | 1.113 | 0.045 | 16.039 | 0.283 | 15.218 | 0.108 |
| L558 | 1.002 | 0.076 | 16.209 | 0.433 | 15.895 | 0.176 |
| V559 | 1.043 | 0.048 | 15.931 | 0.323 | 15.393 | 0.129 |
| E560 | 1.081 | 0.076 | 24.465 | 0.919 | 20.743 | 0.294 |
| E561 | 1.079 | 0.045 | 15.698 | 0.299 | 15.409 | 0.119 |

|      |       |       |        |       |        |       |
|------|-------|-------|--------|-------|--------|-------|
| D562 | 1.040 | 0.040 | 15.626 | 0.264 | 15.355 | 0.103 |
| I563 | 1.040 | 0.068 | 14.738 | 0.368 | 14.609 | 0.152 |
| S565 | 1.053 | 0.032 | 13.916 | 0.181 | 14.321 | 0.078 |
| L566 | 1.036 | 0.047 | 15.494 | 0.264 | 14.718 | 0.103 |
| T567 | 1.154 | 0.021 | 9.198  | 0.064 | 8.732  | 0.028 |
| N568 | 1.117 | 0.011 | 5.375  | 0.028 | 4.868  | 0.012 |

**Table S-VII:** Model-free analysis [<sup>15</sup>N]-PX (600 & 800 MHz, ~0.2 mM)

| Res  | $\tau_c$ [ns] | $S_f^2$ | $S_s^2$ | $\tau_e$ [ps] | $R_{ex}$ |     |    |   |   |
|------|---------------|---------|---------|---------------|----------|-----|----|---|---|
| G462 | 5.33          | 0.27    | 0.281   | 0.015         | - -      | 127 | 15 | - | - |
| S463 | 4.84          | 0.13    | 0.337   | 0.007         | - -      | 109 | 7  | - | - |
| H464 | 5.41          | 0.60    | 0.427   | 0.040         | - -      | 111 | 36 | - | - |
| I470 | 4.48          | 0.08    | 0.533   | 0.009         | - -      | 113 | 10 | - | - |
| E471 | 4.34          | 0.08    | 0.532   | 0.010         | - -      | 127 | 12 | - | - |
| G472 | 4.31          | 0.07    | 0.481   | 0.008         | - -      | 112 | 8  | - | - |
| M474 | 4.37          | 0.10    | 0.513   | 0.011         | - -      | 114 | 12 | - | - |
| K475 | 4.60          | 0.12    | 0.527   | 0.015         | - -      | 106 | 17 | - | - |
| Y476 | 4.73          | 0.12    | 0.532   | 0.014         | - -      | 104 | 16 | - | - |
| K477 | 4.68          | 0.15    | 0.556   | 0.020         | - -      | 99  | 26 | - | - |
| D479 | 4.94          | 0.12    | 0.550   | 0.013         | - -      | 109 | 16 | - | - |
| I481 | 4.87          | 0.12    | 0.531   | 0.013         | - -      | 107 | 15 | - | - |
| R482 | 4.60          | 0.10    | 0.557   | 0.012         | - -      | 120 | 16 | - | - |
| E483 | 4.51          | 0.07    | 0.556   | 0.008         | - -      | 103 | 8  | - | - |
| D484 | 4.60          | 0.06    | 0.571   | 0.007         | - -      | 111 | 8  | - | - |
| P486 | 4.43          | 0.06    | 0.587   | 0.007         | - -      | 120 | 9  | - | - |
| R487 | 4.28          | 0.07    | 0.565   | 0.008         | - -      | 119 | 9  | - | - |
| D488 | 4.24          | 0.06    | 0.562   | 0.007         | - -      | 108 | 8  | - | - |
| E489 | 4.59          | 0.06    | 0.548   | 0.006         | - -      | 97  | 6  | - | - |
| I490 | 4.65          | 0.07    | 0.550   | 0.008         | - -      | 118 | 9  | - | - |
| V494 | 4.47          | 0.06    | 0.533   | 0.007         | - -      | 107 | 7  | - | - |
| Y495 | 4.47          | 0.07    | 0.566   | 0.008         | - -      | 108 | 9  | - | - |
| E497 | 3.92          | 0.06    | 0.516   | 0.006         | - -      | 112 | 7  | - | - |
| R498 | 4.11          | 0.05    | 0.500   | 0.006         | - -      | 109 | 6  | - | - |
| A504 | 3.83          | 0.05    | 0.467   | 0.005         | - -      | 111 | 5  | - | - |
| S505 | 4.50          | 0.06    | 0.437   | 0.005         | - -      | 105 | 5  | - | - |
| N506 | 4.64          | 0.09    | 0.470   | 0.008         | - -      | 111 | 7  | - | - |
| A507 | 4.25          | 0.05    | 0.469   | 0.005         | - -      | 107 | 5  | - | - |
| S508 | 4.40          | 0.05    | 0.475   | 0.005         | - -      | 107 | 5  | - | - |
| R509 | 4.45          | 0.06    | 0.495   | 0.006         | - -      | 109 | 6  | - | - |
| L511 | 4.81          | 0.07    | 0.525   | 0.007         | - -      | 112 | 8  | - | - |
| S513 | 5.13          | 0.09    | 0.527   | 0.008         | - -      | 99  | 8  | - | - |
| K514 | 6.09          | 0.12    | 0.613   | 0.011         | - -      | 129 | 15 | - | - |
| E515 | 5.27          | 0.08    | 0.567   | 0.008         | - -      | 105 | 9  | - | - |
| K516 | 5.84          | 0.11    | 0.624   | 0.012         | - -      | 80  | 13 | - | - |
| T518 | 7.00          | 0.01    | 0.776   | 0.000         | - -      | -   | -  | - | - |
| M519 | 7.34          | -       | 0.841   | 0.019         | - -      | 60  | 49 | - | - |

|      |      |      |       |       |       |       |     |    |     |     |
|------|------|------|-------|-------|-------|-------|-----|----|-----|-----|
| H520 | 7.34 | -    | 0.841 | 0.041 | -     | -     | 56  | 47 | 1.0 | 0.4 |
| S521 | 7.34 | -    | 0.827 | 0.032 | -     | -     | 94  | 39 | 0.8 | 0.3 |
| L522 | 7.34 | -    | 0.774 | 0.043 | -     | -     | 55  | 37 | 1.5 | 0.4 |
| R523 | 7.34 | -    | 0.841 | 0.032 | -     | -     | 133 | 54 | 0.8 | 0.3 |
| L524 | 7.34 | -    | 0.937 | 0.034 | -     | -     | -   | -  | 2.4 | 0.4 |
| V525 | 7.34 | -    | 0.830 | 0.012 | -     | -     | 28  | 34 | -   | -   |
| I526 | 7.34 | -    | 0.801 | 0.054 | -     | -     | 38  | 43 | 6.2 | 0.6 |
| E527 | 7.34 | -    | 0.813 | 0.048 | -     | -     | 26  | 45 | 4.6 | 0.5 |
| S528 | 7.34 | -    | 0.845 | 0.038 | -     | -     | 45  | 41 | 2.0 | 0.3 |
| S529 | 7.34 | -    | 0.823 | 0.014 | -     | -     | 43  | 36 | -   | -   |
| L531 | 7.34 | -    | 0.798 | 0.062 | -     | -     | 20  | 52 | 2.5 | 0.6 |
| S532 | 7.34 | -    | 0.814 | 0.011 | -     | -     | 50  | 32 | -   | -   |
| R533 | 7.34 | -    | 0.833 | 0.013 | -     | -     | 5   | 37 | -   | -   |
| E535 | 7.34 | -    | 0.848 | 0.013 | -     | -     | 30  | 34 | -   | -   |
| K536 | 7.34 | -    | 0.873 | 0.041 | -     | -     | 60  | 57 | 0.8 | 0.4 |
| A537 | 7.34 | -    | 0.859 | 0.030 | -     | -     | 49  | 38 | 2.3 | 0.3 |
| A538 | 7.00 | 0.12 | 0.906 | 0.016 | -     | -     | 7   | 56 | -   | -   |
| Y539 | 7.34 | -    | 0.879 | 0.012 | -     | -     | 49  | 42 | -   | -   |
| V540 | 7.34 | -    | 0.885 | 0.017 | -     | -     | 86  | 82 | -   | -   |
| S542 | 7.34 | -    | 0.841 | 0.009 | -     | -     | 49  | 29 | -   | -   |
| L543 | 7.34 | -    | 0.835 | 0.015 | -     | -     | 120 | 64 | -   | -   |
| S544 | 7.34 | -    | 0.956 | 0.011 | -     | -     | -   | -  | -   | -   |
| K545 | 7.34 | -    | 0.849 | 0.046 | -     | -     | 69  | 57 | 2.0 | 0.4 |
| C546 | 7.34 | -    | 0.825 | 0.011 | -     | -     | 74  | 36 | -   | -   |
| K547 | 7.34 | -    | 0.756 | 0.023 | -     | -     | 49  | 39 | -   | -   |
| T548 | 7.34 | -    | 0.741 | 0.051 | -     | -     | 26  | 34 | 5.4 | 0.6 |
| D549 | 7.34 | -    | 0.854 | 0.016 | -     | -     | 85  | 48 | -   | -   |
| Q550 | 7.34 | -    | 0.787 | 0.009 | -     | -     | 97  | 30 | -   | -   |
| E551 | 7.34 | -    | 0.887 | 0.015 | -     | -     | 31  | 51 | -   | -   |
| V552 | 7.34 | -    | 0.779 | 0.031 | -     | -     | 44  | 26 | 0.8 | 0.3 |
| K553 | 7.34 | -    | 0.891 | 0.039 | -     | -     | 135 | 89 | 3.7 | 0.4 |
| A554 | 7.34 | -    | 0.938 | 0.026 | -     | -     | -   | -  | 1.8 | 0.3 |
| V555 | 7.34 | -    | 0.846 | 0.021 | -     | -     | -   | -  | 0.4 | 0.2 |
| M556 | 7.34 | -    | 0.788 | 0.050 | -     | -     | 34  | 43 | 6.8 | 0.6 |
| E557 | 7.34 | -    | 0.894 | 0.012 | -     | -     | 108 | 69 | -   | -   |
| L558 | 7.34 | -    | 0.830 | 0.033 | -     | -     | -   | -  | 0.7 | 0.3 |
| V559 | 7.34 | -    | 0.861 | 0.025 | -     | -     | -   | -  | 0.5 | 0.2 |
| E560 | 7.34 | -    | 0.885 | 0.048 | -     | -     | 75  | 73 | 6.7 | 0.5 |
| E561 | 7.34 | -    | 0.895 | 0.012 | -     | -     | 64  | 60 | -   | -   |
| D562 | 7.34 | -    | 0.849 | 0.011 | -     | -     | 55  | 34 | -   | -   |
| S565 | 7.34 | -    | 0.874 | 0.009 | -     | -     | 22  | 31 | -   | -   |
| L566 | 7.34 | -    | 0.932 | 0.012 | -     | -     | 9   | 77 | -   | -   |
| T567 | 7.34 | -    | 0.618 | 0.014 | 0.794 | 0.016 | 978 | 95 | -   | -   |
| N568 | 7.34 | -    | 0.323 | 0.005 | 0.683 | 0.008 | 873 | 25 | -   | -   |

**Table S-VIII:**  $^2\text{H}$  relaxation rates [ $\text{s}^{-1}$ ] of PX (600 MHz)

| Res               | $R(D_z)$ | $R(3D_z^2-2)$ | $R(D_+^2)$ | $R(D_+)$  | $R(D_x D_z)$ |
|-------------------|----------|---------------|------------|-----------|--------------|
| I470 $\gamma$ 2   | 21.9 0.1 | 18.1 0.1      | 14.4 0.2   | 45.2 0.2  | 33.7 0.2     |
| I470 $\delta$ 1   | 12.9 0.2 | 10.5 0.2      | 9.6 0.4    | 23.9 0.5  | 16.4 0.3     |
| I481 $\gamma$ 2   | 21.9 0.1 | 18.1 0.1      | 14.4 0.2   | 44.6 0.2  | 33.7 0.2     |
| I481 $\delta$ 1   | 12.9 0.1 | 10.0 0.1      | 8.6 0.2    | 26.1 0.3  | 18.5 0.2     |
| I490 $\gamma$ 2   | 21.9 0.1 | 18.1 0.1      | 14.4 0.2   | 44.6 0.2  | 33.7 0.2     |
| I490 $\delta$ 1   | 12.9 0.1 | 10.0 0.1      | 8.5 0.2    | 26.1 0.3  | 18.5 0.2     |
| V494 $\gamma$ 1   | 26.1 0.2 | 20.0 0.4      | 17.0 0.6   | 46.0 0.6  | 33.4 0.5     |
| V494 $\gamma$ 2   | 22.0 0.2 | 17.3 0.3      | 13.6 0.5   | 37.9 0.5  | 27.2 0.4     |
| T500 $\gamma$ 2   | 28.7 0.3 | 21.4 0.5      | 17.1 0.8   | 48.2 0.7  | 31.7 0.7     |
| A504 $\beta$      | 24.5 0.2 | 19.3 0.3      | 16.5 0.6   | 44.2 0.5  | 32.0 0.4     |
| A507 $\beta$      | 24.5 0.2 | 19.3 0.3      | 16.5 0.6   | 44.2 0.5  | 32.0 0.4     |
| L511 $\delta$ 1   | 21.1 0.2 | 15.3 0.3      | 14.8 0.6   | 36.4 0.5  | 32.4 0.5     |
| L511 $\delta$ 2   | 18.7 0.2 | 13.5 0.2      | 12.3 0.4   | 33.1 0.4  | 23.0 0.3     |
| T518 $\gamma$ 2   | 22.1 0.9 | 18.1 1.1      | 18.6 2.2   | 101.9 4.4 | 90.0 4.1     |
| M519 $\epsilon$ 1 | 7.2 0.1  | 6.3 0.1       | 4.9 0.2    | 22.3 0.3  | 17.8 0.2     |
| L522 $\delta$ 1   | 31.1 4.0 | 30.3 3.8      | 23.0 9.2   | 88.6 12.8 | 92.6 16.3    |
| L522 $\delta$ 2   | 20.8 0.7 | 17.9 1.2      | 15.9 2.4   | 89.0 3.3  | 81.6 4.0     |
| L524 $\delta$ 1   | 22.0 0.3 | 15.4 0.4      | 14.0 0.7   | 49.8 0.8  | 35.5 0.7     |
| L524 $\delta$ 2   | 20.1 0.2 | 14.8 0.3      | 14.2 0.6   | 47.5 0.7  | 36.2 0.6     |
| V525 $\gamma$ 1   | 32.0 0.8 | 22.0 1.3      | 21.5 2.3   | 111.3 3.1 | 92.8 4.0     |
| V525 $\gamma$ 2   | 15.9 0.5 | 15.3 0.7      | 14.3 1.4   | 94.9 2.5  | 78.2 2.8     |
| I526 $\gamma$ 2   | 20.2 0.9 | 17.0 1.4      | 18.0 3.0   | 112.9 4.7 | 104.5 6.4    |
| I526 $\delta$ 1   | 12.8 0.7 | 14.5 1.1      | 11.7 2.4   | 93.7 3.8  | 82.7 4.5     |
| L531 $\delta$ 1   | 29.7 1.7 | 26.8 3.1      | 22.6 6.7   | 98.7 5.2  | 97.8 8.9     |
| L531 $\delta$ 2   | 19.5 0.5 | 16.6 0.7      | 17.5 1.8   | 82.8 2.0  | 77.0 2.6     |
| A534 $\beta$      | 27.6 1.4 | 20.5 1.6      | 26.8 3.4   | 126.8 4.9 | 108.5 6.8    |
| A537 $\beta$      | 18.9 0.7 | 17.6 1.1      | 14.7 2.0   | 105.2 3.7 | 99.2 4.9     |
| A538 $\beta$      | 24.1 0.8 | 20.4 1.4      | 16.2 2.5   | 127.2 4.8 | 107.1 6.2    |
| V540 $\gamma$ 1   | 38.2 0.9 | 32.9 1.8      | 32.4 4.1   | 117.7 2.9 | 90.9 4.5     |
| V540 $\gamma$ 2   | 18.3 0.7 | 17.6 1.1      | 16.0 2.2   | 94.5 3.4  | 95.0 4.7     |
| L543 $\delta$ 1   | 28.5 0.6 | 23.9 1.2      | 19.9 1.8   | 72.5 1.7  | 57.6 2.1     |
| L543 $\delta$ 2   | 28.5 0.6 | 23.9 1.2      | 19.9 1.8   | 72.5 1.7  | 57.6 2.1     |



|                   |          |          |          |           |           |
|-------------------|----------|----------|----------|-----------|-----------|
| T548 $\gamma$ 2   | 29.0 1.0 | 25.5 1.9 | 16.5 3.3 | 108.4 3.9 | 90.1 5.1  |
| V552 $\gamma$ 1   | 23.4 0.6 | 21.1 0.9 | 17.7 1.7 | 102.2 2.5 | 83.1 3.0  |
| V552 $\gamma$ 2   | 30.3 1.4 | 27.4 2.7 | 28.1 6.4 | 123.9 5.9 | 83.8 7.7  |
| A554 $\beta$      | 18.1 0.6 | 17.2 1.0 | 14.0 1.9 | 105.6 3.6 | 101.5 4.7 |
| V555 $\gamma$ 1   | 25.4 0.6 | 18.5 0.8 | 15.6 1.7 | 94.1 2.1  | 80.9 2.7  |
| V555 $\gamma$ 2   | 18.7 0.9 | 15.0 1.3 | 13.0 2.5 | 87.5 3.7  | 68.3 4.3  |
| M556 $\epsilon$ 1 | 8.4 0.2  | 9.9 0.3  | 8.3 0.5  | 73.5 1.2  | 68.4 1.3  |
| L558 $\delta$ 1   | 24.3 1.0 | 17.9 1.4 | 16.7 3.1 | 77.0 3.5  | 78.6 4.6  |
| L558 $\delta$ 2   | 21.3 0.6 | 16.0 0.8 | 15.1 2.1 | 79.0 2.2  | 66.6 2.7  |
| V559 $\gamma$ 1   | 21.5 0.6 | 18.6 0.9 | 15.4 1.6 | 94.5 2.5  | 80.1 2.9  |
| V559 $\gamma$ 2   | 19.2 1.0 | 17.7 1.8 | 15.5 3.8 | 95.1 4.4  | 89.0 6.3  |
| I563 $\gamma$ 2   | 21.2 0.5 | 16.0 0.8 | 14.5 1.6 | 109.7 2.8 | 111.0 4.1 |
| I563 $\delta$ 1   | 16.3 0.8 | 15.6 1.2 | 14.7 2.5 | 100.5 4.2 | 100.9 5.7 |
| L566 $\delta$ 1   | 23.2 0.7 | 19.0 1.1 | 17.7 2.6 | 59.4 2.0  | 53.3 2.4  |
| L566 $\delta$ 2   | 18.8 0.4 | 13.7 0.5 | 11.3 1.0 | 51.9 1.2  | 41.2 1.1  |
| T567 $\gamma$ 2   | 25.8 0.4 | 21.2 0.6 | 15.4 0.9 | 52.9 0.9  | 38.8 0.9  |

**Table S-IX:**  $^2\text{H}$  relaxation rates [ $\text{s}^{-1}$ ] of PX (800 MHz)

| Res             | $R(D_z)$ | $R(3D_z^2-2)$ | $R(D_+^2)$ | $R(D_+)$  | $R(D_x D_z)$ |
|-----------------|----------|---------------|------------|-----------|--------------|
| I470 $\gamma$ 2 | 19.3 0.1 | 15.6 0.0      | 13.3 0.0   | 44.0 0.4  | 34.4 0.1     |
| I470 $\delta$ 1 | 11.3 0.1 | 9.3 0.1       | 7.3 0.1    | 22.4 0.7  | 16.5 0.2     |
| I481 $\gamma$ 2 | 19.1 0.1 | 15.6 0.0      | 13.3 0.0   | 44.0 0.4  | 34.4 0.1     |
| I481 $\delta$ 1 | 11.0 0.1 | 9.1 0.0       | 7.4 0.0    | 23.7 0.4  | 19.4 0.1     |
| I490 $\gamma$ 2 | 19.3 0.1 | 15.6 0.0      | 13.3 0.0   | 44.0 0.4  | 34.4 0.1     |
| I490 $\delta$ 1 | 11.0 0.1 | 9.1 0.0       | 7.4 0.0    | 23.7 0.4  | 19.4 0.1     |
| V494 $\gamma$ 1 | 23.6 0.2 | 18.4 0.1      | 15.3 0.1   | 45.4 0.8  | 33.9 0.3     |
| V494 $\gamma$ 2 | 19.0 0.1 | 14.7 0.1      | 12.8 0.1   | 36.4 0.7  | 27.2 0.2     |
| T500 $\gamma$ 2 | 24.3 0.2 | 18.9 0.1      | 16.5 0.1   | 44.1 1.0  | 34.9 0.3     |
| A504 $\beta$    | 22.7 0.2 | 17.4 0.1      | 15.3 0.1   | 40.9 0.6  | 32.6 0.2     |
| A507 $\beta$    | 23.1 0.2 | 17.2 0.1      | 15.3 0.1   | 40.9 0.6  | 32.6 0.2     |
| L511 $\delta$ 1 | 20.5 0.1 | 14.0 0.1      | 12.9 0.1   | 35.0 0.7  | 25.7 0.2     |
| L511 $\delta$ 2 | 17.3 0.1 | 12.5 0.1      | 11.0 0.1   | 31.7 0.7  | 24.4 0.2     |
| T518 $\gamma$ 2 | 19.4 0.6 | 17.9 0.3      | 15.6 0.4   | 105.5 4.8 | 90.5 2.2     |

|        |          |          |          |            |           |
|--------|----------|----------|----------|------------|-----------|
| M519ε1 | 5.9 0.1  | 5.0 0.0  | 4.1 0.0  | 18.6 0.4   | 18.7 0.1  |
| L522δ1 | 19.7 2.6 | 19.1 1.1 | 11.5 1.8 | 73.3 20.9  | 71.1 10.3 |
| L522δ2 | 15.9 0.6 | 15.9 0.3 | 12.7 0.4 | 96.4 5.4   | 78.0 2.5  |
| L524δ1 | 20.8 0.2 | 15.3 0.1 | 14.0 0.1 | 49.6 1.1   | 39.0 0.4  |
| L524δ2 | 20.2 0.2 | 14.2 0.1 | 12.7 0.1 | 47.4 1.1   | 37.7 0.4  |
| V525γ1 | 27.3 0.6 | 19.8 0.4 | 21.1 0.5 | 110.7 4.3  | 96.4 2.7  |
| V525γ2 | 13.7 0.4 | 12.9 0.2 | 10.1 0.3 | 99.4 4.4   | 87.8 2.0  |
| I526γ2 | 16.4 0.8 | 12.3 0.5 | 13.7 0.7 | 117.0 8.6  | 108.5 4.8 |
| I526δ1 | 8.9 0.5  | 12.4 0.4 | 11.3 0.5 | 94.3 6.3   | 81.6 3.0  |
| L531δ1 | 27.7 1.0 | 21.7 0.6 | 18.0 0.7 | 91.0 5.4   | 90.4 3.5  |
| L531δ2 | 17.9 0.4 | 14.2 0.2 | 13.8 0.3 | 82.6 3.0   | 74.7 1.6  |
| A534β  | 23.1 0.9 | 19.3 0.4 | 18.1 0.6 | 127.2 7.7  | 114.9 3.9 |
| A537β  | 16.4 0.6 | 14.1 0.3 | 12.6 0.4 | 115.8 6.3  | 107.0 3.0 |
| A538β  | 17.6 0.7 | 14.1 0.4 | 15.6 0.5 | 123.8 7.3  | 114.7 3.7 |
| V540γ1 | 34.4 0.7 | 22.5 0.4 | 23.0 0.5 | 117.7 4.5  | 104.8 3.2 |
| V540γ2 | 15.3 0.6 | 11.9 0.3 | 13.6 0.5 | 95.6 5.8   | 84.7 2.8  |
| L543δ1 | 27.8 0.4 | 23.3 0.3 | 17.5 0.3 | 73.8 2.2   | 58.1 1.1  |
| L543δ2 | 27.8 0.4 | 23.3 0.3 | 17.5 0.3 | 73.8 2.2   | 58.1 1.1  |
| T548γ2 | 26.8 0.8 | 18.8 0.4 | 19.6 0.6 | 108.7 5.2  | 96.2 2.8  |
| V552γ1 | 20.3 0.5 | 14.9 0.3 | 14.7 0.4 | 99.6 3.9   | 94.1 2.2  |
| V552γ2 | 30.4 1.6 | 22.1 1.0 | 20.8 1.3 | 106.7 10.5 | 103.2 6.5 |
| A554β  | 15.8 0.6 | 13.4 0.3 | 12.0 0.4 | 99.3 6.0   | 93.5 2.6  |
| V555γ1 | 23.3 0.4 | 15.9 0.3 | 17.2 0.4 | 96.5 3.4   | 87.8 2.0  |
| V555γ2 | 17.8 0.8 | 12.4 0.5 | 13.5 0.7 | 92.7 8.1   | 78.0 3.7  |
| M556ε1 | 6.5 0.2  | 6.8 0.1  | 5.7 0.1  | 68.5 2.2   | 70.4 0.9  |
| L558δ1 | 27.1 1.3 | 13.9 0.6 | 17.3 1.0 | 80.0 8.0   | 86.1 4.5  |
| L558δ2 | 18.2 0.4 | 15.0 0.3 | 12.2 0.4 | 76.6 3.4   | 69.7 1.8  |
| V559γ1 | 18.0 0.4 | 14.1 0.2 | 14.1 0.3 | 98.4 3.6   | 86.8 1.9  |
| V559γ2 | 19.6 0.9 | 13.5 0.6 | 18.6 1.0 | 84.2 8.1   | 84.5 5.5  |
| I563γ2 | 15.4 0.6 | 15.3 0.3 | 13.0 0.4 | 131.5 6.1  | 104.1 2.6 |
| I563δ1 | 14.2 0.7 | 11.1 0.4 | 9.7 0.5  | 96.8 6.6   | 97.9 3.8  |
| L566δ1 | 21.8 1.1 | 14.1 0.4 | 15.0 0.6 | 62.0 5.4   | 69.7 2.8  |
| L566δ2 | 16.6 0.3 | 13.3 0.2 | 11.2 0.2 | 52.4 1.8   | 44.6 0.7  |
| T567γ2 | 23.0 0.3 | 17.4 0.1 | 14.7 0.1 | 53.6 1.3   | 40.4 0.4  |

**Table S-X:** Methyl side-chain model-free parameters from  $^2\text{H}$  relaxation rates (600 & 800 MHz)

| Res               | $S^2_{axis}$ | $\tau_e$ [ps] | $\tau_c$ [ns] |
|-------------------|--------------|---------------|---------------|
| I470 $\gamma$ 2   | 0.497 0.005  | 40.9 0.4      | 3.33 0.03     |
| I470 $\delta$ 1   | 0.289 0.009  | 21.2 0.6      | 2.56 0.06     |
| I481 $\gamma$ 2   | 0.502 0.005  | 40.6 0.3      | 3.30 0.03     |
| I481 $\delta$ 1   | 0.282 0.005  | 23.0 0.3      | 3.25 0.05     |
| I490 $\gamma$ 2   | 0.497 0.005  | 40.9 0.3      | 3.32 0.03     |
| I490 $\delta$ 1   | 0.280 0.005  | 23.1 0.3      | 3.27 0.05     |
| V494 $\gamma$ 1   | 0.481 0.013  | 51.4 0.9      | 3.01 0.07     |
| V494 $\gamma$ 2   | 0.389 0.009  | 41.2 0.6      | 2.97 0.06     |
| T500 $\gamma$ 2   | 0.468 0.015  | 55.6 1.0      | 3.03 0.08     |
| A504 $\beta$      | 0.433 0.011  | 50.6 0.7      | 3.16 0.07     |
| A507 $\beta$      | 0.414 0.011  | 51.5 0.7      | 3.28 0.07     |
| L511 $\delta$ 1   | 0.264 0.010  | 47.2 0.6      | 4.04 0.14     |
| L511 $\delta$ 2   | 0.269 0.009  | 39.3 0.6      | 3.72 0.11     |
| T518 $\gamma$ 2   | 0.740 0.011  | 57.3 1.3      | 7.64 -        |
| M519 $\epsilon$ 1 | 0.230 0.004  | 11.9 0.3      | 4.71 0.08     |
| L522 $\delta$ 1   | 0.552 0.046  | 69.3 4.7      | 7.64 -        |
| L522 $\delta$ 2   | 0.648 0.012  | 49.1 1.3      | 7.64 -        |
| L524 $\delta$ 1   | 0.240 0.002  | 55.3 0.4      | 7.64 -        |
| L524 $\delta$ 2   | 0.239 0.002  | 51.0 0.4      | 7.64 -        |
| V525 $\gamma$ 1   | 0.750 0.013  | 70.3 1.4      | 7.64 -        |
| V525 $\gamma$ 2   | 0.732 0.011  | 34.6 0.9      | 7.64 -        |
| I526 $\gamma$ 2   | 0.907 0.023  | 34.9 2.1      | 7.64 -        |
| I526 $\delta$ 1   | 0.730 0.015  | 29.8 1.4      | 7.64 -        |
| L531 $\delta$ 1   | 0.658 0.019  | 74.8 2.5      | 7.64 -        |
| L531 $\delta$ 2   | 0.600 0.008  | 45.3 0.9      | 7.64 -        |
| A534 $\beta$      | 0.936 0.020  | 62.2 1.9      | 7.64 -        |
| A537 $\beta$      | 0.876 0.015  | 38.8 1.3      | 7.64 -        |
| A538 $\beta$      | 0.971 0.018  | 41.7 1.7      | 7.64 -        |
| V540 $\gamma$ 1   | 0.747 0.015  | 84.1 1.7      | 7.64 -        |
| V540 $\gamma$ 2   | 0.731 0.013  | 35.4 1.3      | 7.64 -        |
| L543 $\delta$ 1   | 0.884 0.042  | 55.2 2.7      | 3.52 0.15     |
| L543 $\delta$ 2   | 0.884 0.042  | 55.2 2.7      | 3.52 0.15     |

|        |       |       |      |     |      |      |
|--------|-------|-------|------|-----|------|------|
| T548γ2 | 0.746 | 0.014 | 64.9 | 1.7 | 7.64 | -    |
| V552γ1 | 0.738 | 0.011 | 48.0 | 1.1 | 7.64 | -    |
| V552γ2 | 0.773 | 0.032 | 73.4 | 3.4 | 7.64 | -    |
| A554β  | 0.812 | 0.013 | 37.2 | 1.3 | 7.64 | -    |
| V555γ1 | 0.672 | 0.009 | 54.1 | 1.0 | 7.64 | -    |
| V555γ2 | 0.624 | 0.018 | 38.7 | 1.8 | 7.64 | -    |
| M556ε1 | 0.617 | 0.004 | 13.1 | 0.4 | 7.64 | -    |
| L558δ1 | 0.578 | 0.020 | 50.2 | 2.1 | 7.64 | -    |
| L558δ2 | 0.541 | 0.008 | 48.4 | 1.1 | 7.64 | -    |
| V559γ1 | 0.701 | 0.009 | 44.4 | 1.0 | 7.64 | -    |
| V559γ2 | 0.695 | 0.024 | 42.1 | 2.3 | 7.64 | -    |
| I563γ2 | 0.893 | 0.013 | 43.4 | 1.1 | 7.64 | -    |
| I563δ1 | 0.828 | 0.018 | 28.5 | 1.8 | 7.64 | -    |
| L566δ1 | 0.395 | 0.012 | 51.4 | 1.5 | 7.64 | -    |
| L566δ2 | 0.312 | 0.004 | 45.8 | 0.5 | 7.64 | -    |
| T567γ2 | 0.530 | 0.019 | 49.9 | 1.3 | 3.69 | 0.11 |
